# Supplementary material for: Magnetic Nanocomposites of Coated Ferrites/MOF as Pesticide Adsorbents
Source: MDPI journal article supplement (doi:10.3390/molecules28010039), 2022-12-21
Supplement: s1 [file s1]

## Supplementary Materials

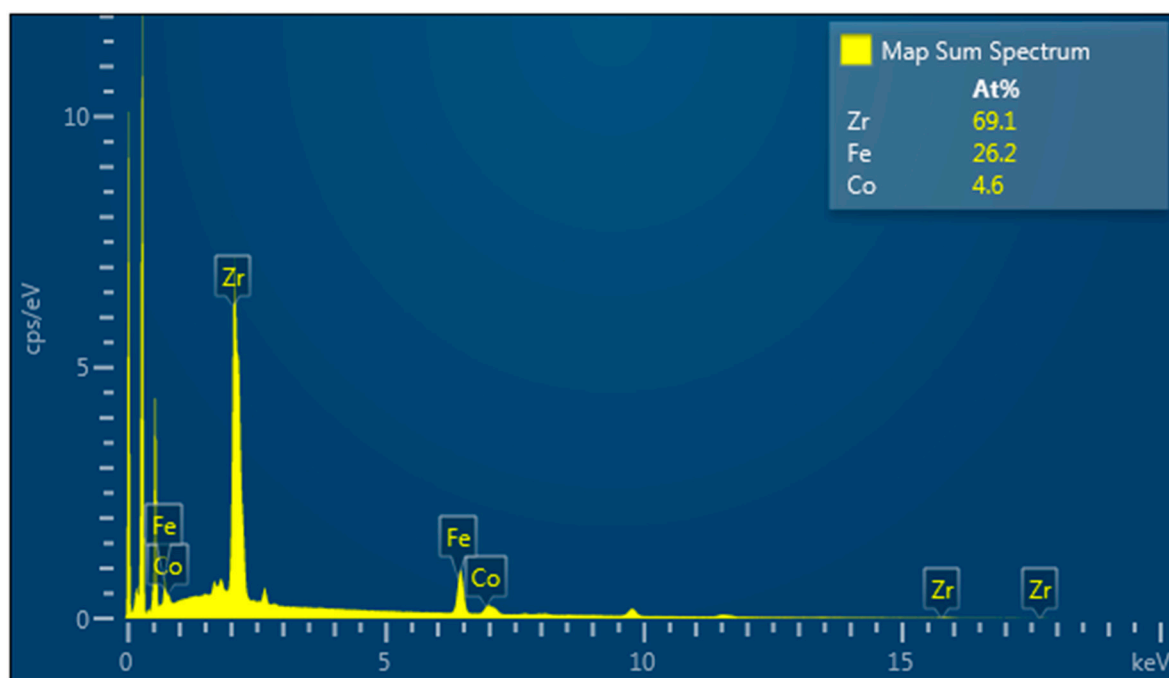

Figure S1. SEM/EDS spectrum of CF MMOF.

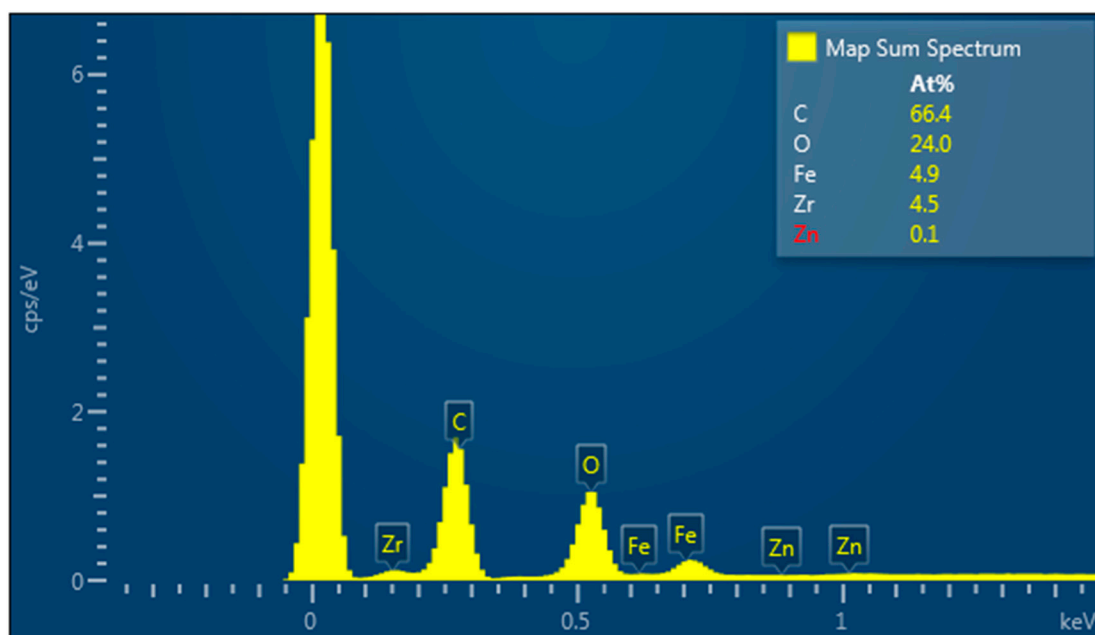

Figure S2. SEM/EDS spectrum of ZF(acac) MMOF.

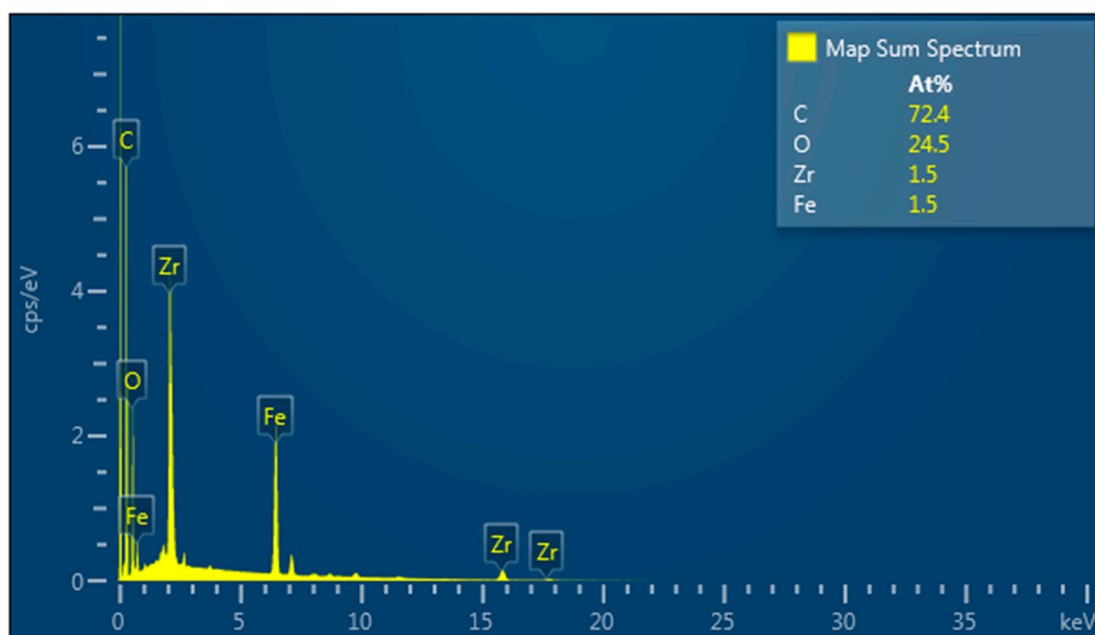

**Figure S3.** SEM/EDS spectrum of ZF(Cl) MMOF.

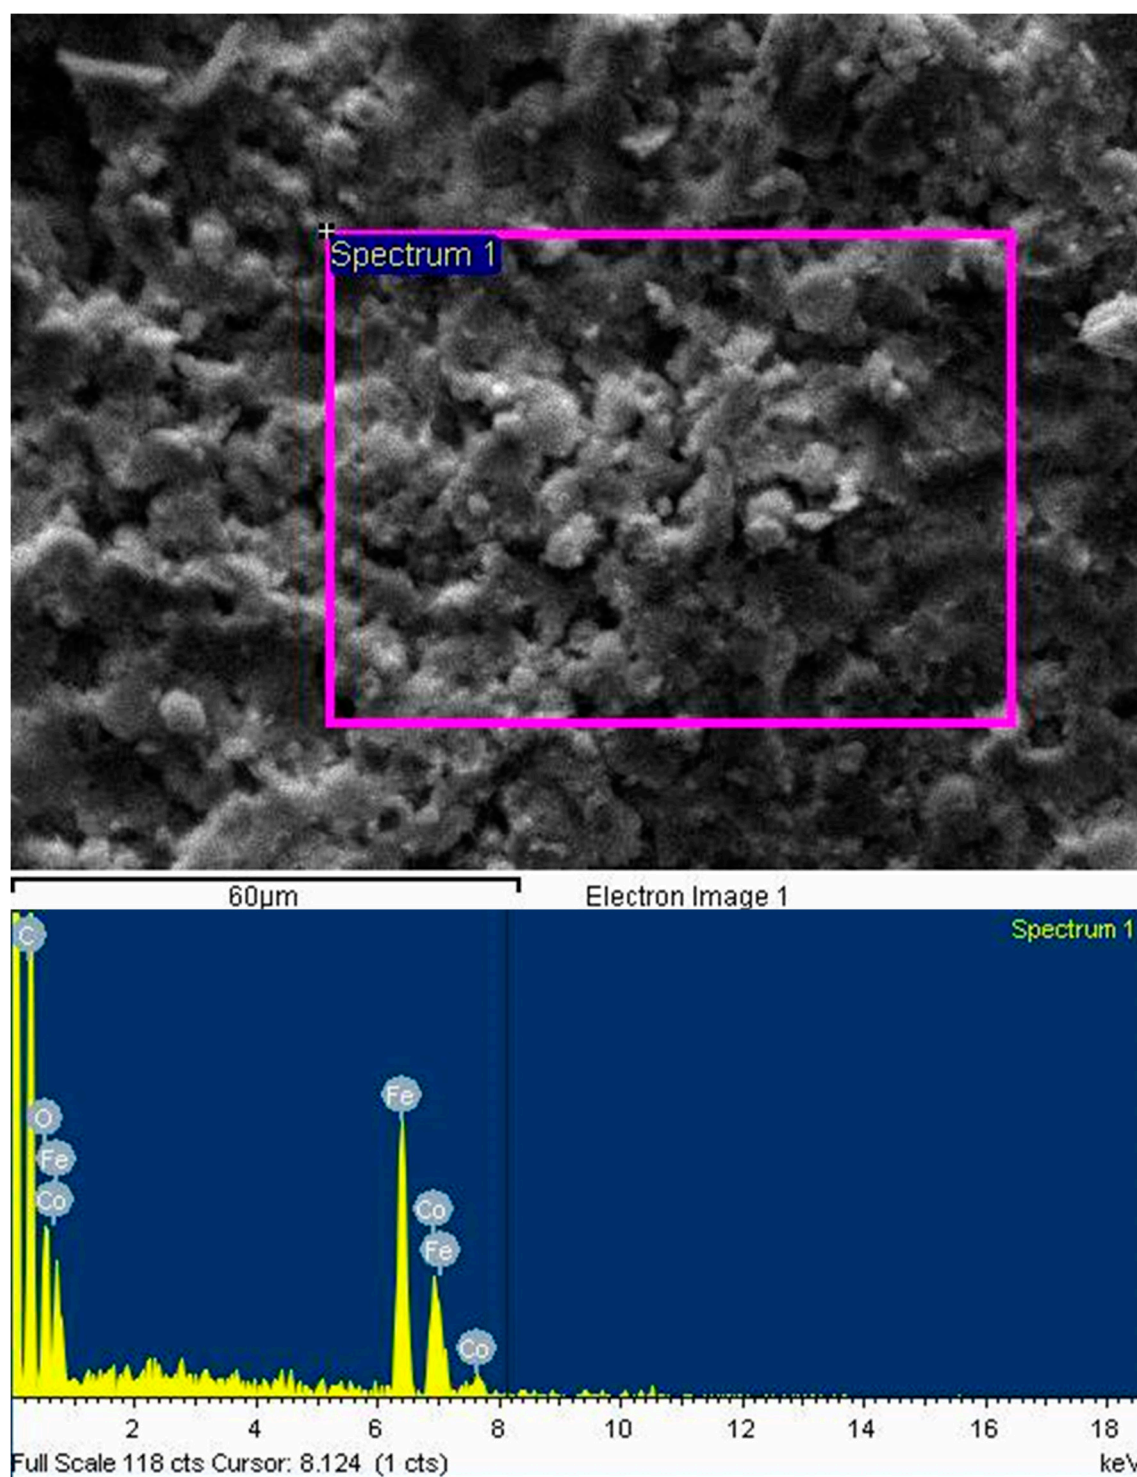

**Figure S4.** SEM/EDS of CF MNPs.

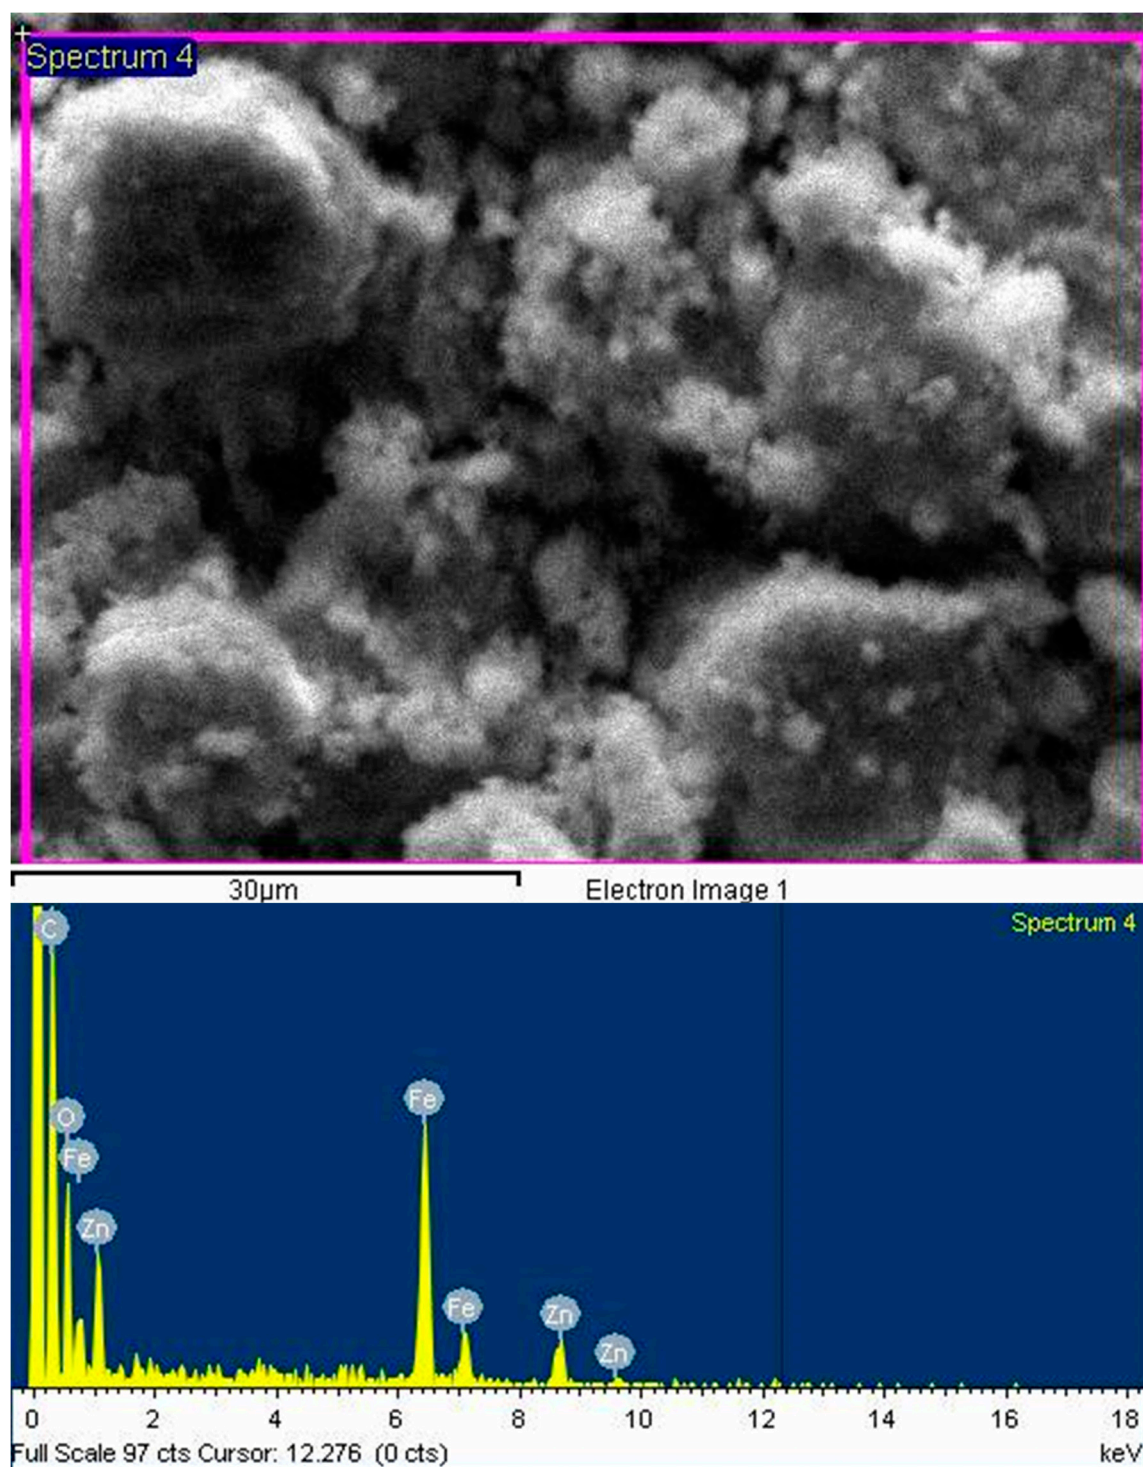

**Figure S5.** SEM/EDS of ZF(acac) MNPs.

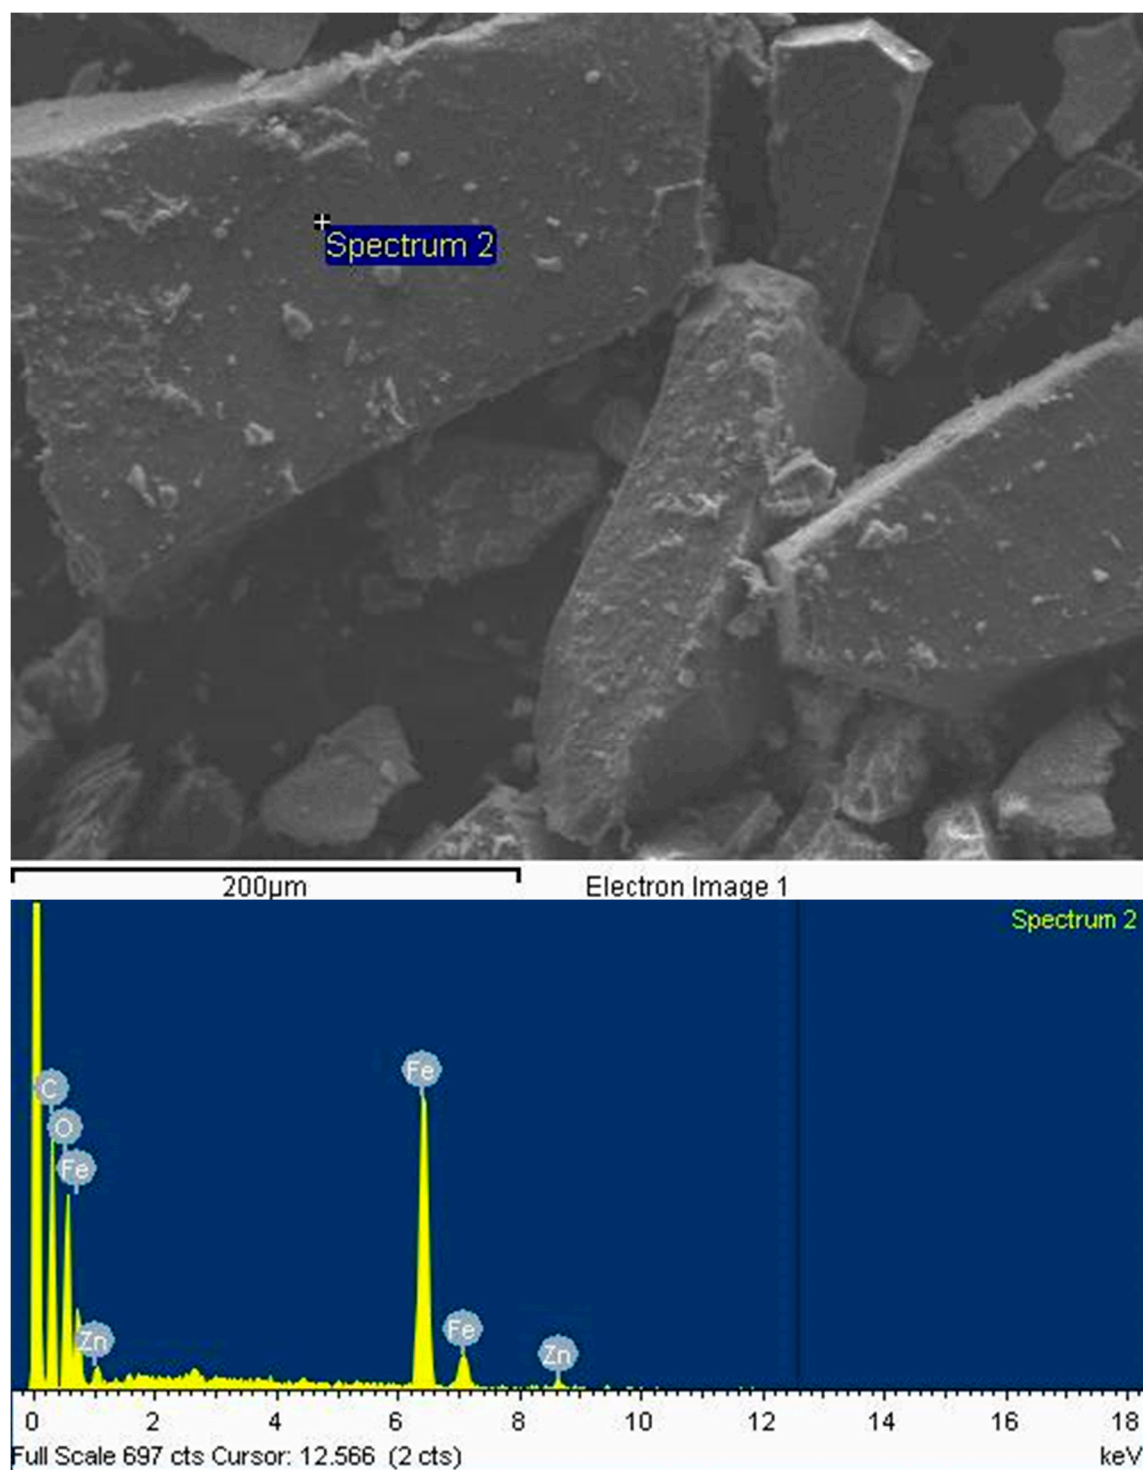

**Figure S6.** SEM/EDS of ZF(Cl) MNPs.

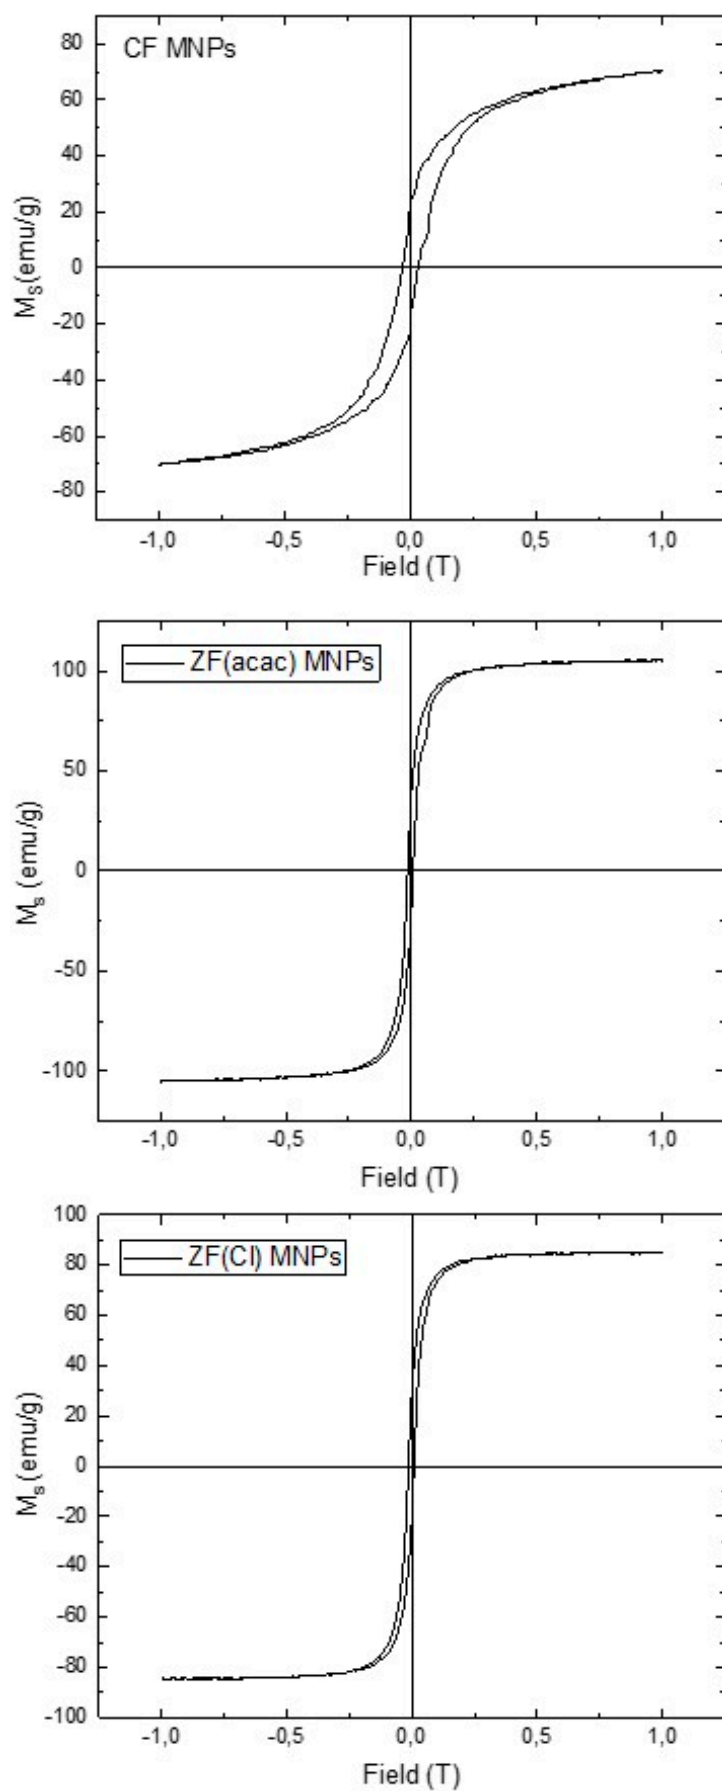

**Figure S7.** VSM hysteresis loops of CF, ZF(acac) and ZF(Cl) MNPs.



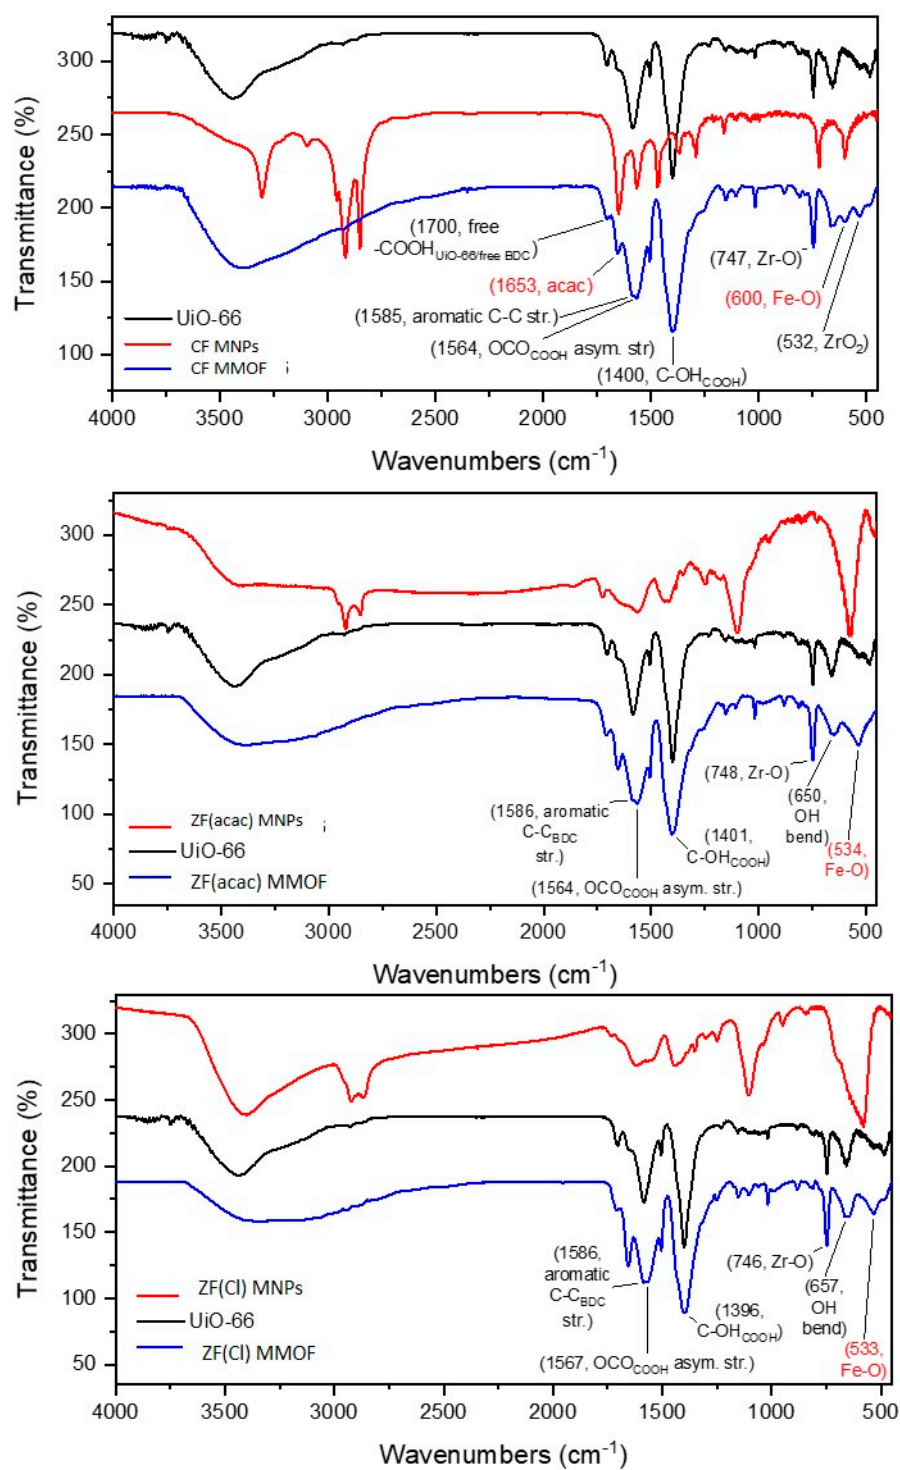

**Figure S8.** FTIR spectra for all MNPs and MMOFs.

**Table S1.** Recycle data after 24 hours of adsorption period for all three washed and dried MMOFs, in comparison with the 2,4-D starting solution curve.

| Long Name | A(X1)       | B(Y1)     | C(X2)      | D(Y2)     | E(X3)      | F(Y3)     | G(X4)      | H(Y4)     |
|-----------|-------------|-----------|------------|-----------|------------|-----------|------------|-----------|
| Units     | Wavelength  | Absorbanc | Wavelength | Absorbanc | Wavelength | Absorbanc | Wavelength | Absorbanc |
| Comments  | nm          | a.u.      | nm         | a.u.      | nm         | a.u.      | nm         | a.u.      |
| F(x)      | 2,4-D stock |           | ZF(acac)@  |           | ZF(Cl)@P   |           | CF@ODA     |           |
| 1         | 350         | 0.001     | 350        | -0.002    | 350        | -0.016    | 350        | 0.007     |
| 2         | 349         | 0.002     | 349        | -0.001    | 349        | -0.016    | 349        | 0.008     |
| 3         | 348         | 0.003     | 348        | 0         | 348        | -0.017    | 348        | 0.008     |
| 4         | 347         | 0.002     | 347        | -0.001    | 347        | -0.018    | 347        | 0.008     |
| 5         | 346         | 0.003     | 346        | -0.001    | 346        | -0.018    | 346        | 0.009     |
| 6         | 345         | 0.002     | 345        | 0         | 345        | -0.019    | 345        | 0.008     |
| 7         | 344         | 0.002     | 344        | -0.001    | 344        | -0.022    | 344        | 0.007     |
| 8         | 343         | 0.002     | 343        | 0         | 343        | 0.022     | 343        | 0.007     |
| 9         | 342         | 0.003     | 342        | 0.001     | 342        | 0.023     | 342        | 0.009     |
| 10        | 341         | 0.003     | 341        | 0.001     | 341        | -0.024    | 341        | 0.008     |
| 11        | 340         | 0.003     | 340        | 0         | 340        | -0.022    | 340        | 0.005     |
| 12        | 339         | 0.003     | 339        | -0.001    | 339        | -0.019    | 339        | 0.004     |
| 13        | 338         | 0.002     | 338        | -0.002    | 338        | -0.02     | 338        | 0.004     |
| 14        | 337         | 0.002     | 337        | -0.002    | 337        | -0.02     | 337        | 0.002     |
| 15        | 336         | 0.002     | 336        | -0.001    | 336        | -0.018    | 336        | 0.005     |
| 16        | 335         | 0.002     | 335        | -0.002    | 335        | -0.018    | 335        | 0.001     |
| 17        | 334         | 0.002     | 334        | -0.001    | 334        | -0.019    | 334        | 0.001     |
| 18        | 333         | 0.003     | 333        | 0         | 333        | 0.018     | 333        | 0.005     |
| 19        | 332         | 0.002     | 332        | 0.002     | 332        | 0.018     | 332        | 0.004     |
| 20        | 331         | 0.003     | 331        | -0.002    | 331        | -0.018    | 331        | 0.005     |
| 21        | 330         | 0.003     | 330        | 0.001     | 330        | -0.017    | 330        | 0.005     |
| 22        | 329         | 0.004     | 329        | -0.001    | 329        | -0.018    | 329        | 0.005     |
| 23        | 328         | 0.004     | 328        | 0         | 328        | -0.017    | 328        | 0.005     |
| 24        | 327         | 0.004     | 327        | 0.001     | 327        | -0.017    | 327        | 0.006     |
| 25        | 326         | 0.003     | 326        | -0.001    | 326        | -0.017    | 326        | 0.005     |
| 26        | 325         | 0.003     | 325        | -0.001    | 325        | -0.017    | 325        | 0.006     |
| 27        | 324         | 0.003     | 324        | -0.001    | 324        | -0.017    | 324        | 0.005     |
| 28        | 323         | 0.003     | 323        | 0.001     | 323        | 0.017     | 323        | 0.005     |
| 29        | 322         | 0.003     | 322        | -0.001    | 322        | 0.017     | 322        | 0.005     |
| 30        | 321         | 0.004     | 321        | -0.001    | 321        | -0.016    | 321        | 0.006     |
| 31        | 320         | 0.004     | 320        | -0.001    | 320        | -0.016    | 320        | 0.006     |
| 32        | 319         | 0.004     | 319        | -0.001    | 319        | -0.016    | 319        | 0.006     |
| 33        | 318         | 0.004     | 318        | -0.001    | 318        | -0.015    | 318        | 0.006     |
| 34        | 317         | 0.006     | 317        | 0         | 317        | -0.015    | 317        | 0.006     |
| 35        | 316         | 0.004     | 316        | -0.001    | 316        | -0.015    | 316        | 0.007     |
| 36        | 315         | 0.006     | 315        | 0         | 315        | -0.014    | 315        | 0.007     |
| 37        | 314         | 0.005     | 314        | 0         | 314        | -0.015    | 314        | 0.007     |
| 38        | 313         | 0.006     | 313        | 0.001     | 313        | 0.014     | 313        | 0.008     |
| 39        | 312         | 0.007     | 312        | 0.002     | 312        | 0.013     | 312        | 0.01      |
| 40        | 311         | 0.008     | 311        | 0.002     | 311        | -0.013    | 311        | 0.01      |
| 41        | 310         | 0.007     | 310        | 0.003     | 310        | -0.011    | 310        | 0.011     |
| 42        | 309         | 0.008     | 309        | 0.006     | 309        | -0.009    | 309        | 0.013     |
| 43        | 308         | 0.009     | 308        | 0.009     | 308        | -0.007    | 308        | 0.016     |
| 44        | 307         | 0.011     | 307        | 0.011     | 307        | -0.005    | 307        | 0.019     |
| 45        | 306         | 0.014     | 306        | 0.016     | 306        | -0.001    | 306        | 0.023     |
| 46        | 305         | 0.018     | 305        | 0.023     | 305        | 0.005     | 305        | 0.03      |
| 47        | 304         | 0.026     | 304        | 0.034     | 304        | 0.014     | 304        | 0.039     |
| 48        | 303         | 0.035     | 303        | 0.046     | 303        | 0.026     | 303        | 0.061     |
| 49        | 302         | 0.049     | 302        | 0.06      | 302        | 0.04      | 302        | 0.083     |
| 50        | 301         | 0.072     | 301        | 0.087     | 301        | 0.061     | 301        | 0.092     |
| 51        | 300         | 0.104     | 300        | 0.119     | 300        | 0.091     | 300        | 0.124     |
| 52        | 299         | 0.152     | 299        | 0.165     | 299        | 0.133     | 299        | 0.165     |
| 53        | 298         | 0.219     | 298        | 0.227     | 298        | 0.191     | 298        | 0.232     |
| 54        | 297         | 0.314     | 297        | 0.311     | 297        | 0.297     | 297        | 0.314     |
| 55        | 296         | 0.411     | 296        | 0.423     | 296        | 0.365     | 296        | 0.423     |
| 56        | 295         | 0.596     | 295        | 0.56      | 295        | 0.487     | 295        | 0.588     |
| 57        | 294         | 0.776     | 294        | 0.718     | 294        | 0.623     | 294        | 0.71      |
| 58        | 293         | 0.955     | 293        | 0.875     | 293        | 0.744     | 293        | 0.884     |
| 59        | 292         | 1.107     | 292        | 1.01      | 292        | 0.841     | 292        | 0.991     |
| 60        | 291         | 1.203     | 291        | 1.099     | 291        | 0.904     | 291        | 1.070     |
| 61        | 290         | 1.257     | 290        | 1.147     | 290        | 0.938     | 290        | 1.123     |
| 62        | 289         | 1.27      | 289        | 1.165     | 289        | 0.951     | 289        | 1.143     |
| 63        | 288         | 1.278     | 288        | 1.175     | 288        | 0.950     | 288        | 1.154     |
| 64        | 287         | 1.287     | 287        | 1.185     | 287        | 0.961     | 287        | 1.164     |
| 65        | 286         | 1.305     | 286        | 1.201     | 286        | 0.97      | 286        | 1.181     |
| 66        | 285         | 1.332     | 285        | 1.229     | 285        | 0.98      | 285        | 1.205     |
| 67        | 284         | 1.364     | 284        | 1.246     | 284        | 0.99      | 284        | 1.23      |
| 68        | 283         | 1.37      | 283        | 1.266     | 283        | 0.997     | 283        | 1.242     |
| 69        | 282         | 1.387     | 282        | 1.28      | 282        | 0.997     | 282        | 1.244     |
| 70        | 281         | 1.353     | 281        | 1.247     | 281        | 0.963     | 281        | 1.225     |
| 71        | 280         | 1.313     | 280        | 1.209     | 280        | 0.969     | 280        | 1.187     |
| 72        | 279         | 1.275     | 279        | 1.169     | 279        | 0.946     | 279        | 1.146     |
| 73        | 278         | 1.23      | 278        | 1.129     | 278        | 0.918     | 278        | 1.109     |
| 74        | 277         | 1.184     | 277        | 1.082     | 277        | 0.891     | 277        | 1.051     |
| 75        | 276         | 1.136     | 276        | 1.034     | 276        | 0.864     | 276        | 1.014     |
| 76        | 275         | 1.085     | 275        | 0.999     | 275        | 0.837     | 275        | 0.973     |
| 77        | 274         | 1.039     | 274        | 0.954     | 274        | 0.807     | 274        | 0.93      |
| 78        | 273         | 0.982     | 273        | 0.906     | 273        | 0.774     | 273        | 0.883     |
| 79        | 272         | 0.918     | 272        | 0.853     | 272        | 0.734     | 272        | 0.829     |
| 80        | 271         | 0.852     | 271        | 0.798     | 271        | 0.692     | 271        | 0.774     |
| 81        | 270         | 0.782     | 270        | 0.743     | 270        | 0.648     | 270        | 0.721     |
| 82        | 269         | 0.719     | 269        | 0.693     | 269        | 0.606     | 269        | 0.672     |
| 83        | 268         | 0.66      | 268        | 0.65      | 268        | 0.569     | 268        | 0.63      |
| 84        | 267         | 0.605     | 267        | 0.611     | 267        | 0.533     | 267        | 0.592     |
| 85        | 266         | 0.554     | 266        | 0.577     | 266        | 0.501     | 266        | 0.558     |
| 86        | 265         | 0.503     | 265        | 0.545     | 265        | 0.47      | 265        | 0.526     |
| 87        | 264         | 0.457     | 264        | 0.518     | 264        | 0.443     | 264        | 0.489     |
| 88        | 263         | 0.413     | 263        | 0.496     | 263        | 0.419     | 263        | 0.476     |
| 89        | 262         | 0.374     | 262        | 0.479     | 262        | 0.399     | 262        | 0.458     |
| 90        | 261         | 0.338     | 261        | 0.47      | 261        | 0.364     | 261        | 0.447     |
| 91        | 260         | 0.305     | 260        | 0.466     | 260        | 0.374     | 260        | 0.442     |
| 92        | 259         | 0.276     | 259        | 0.471     | 259        | 0.37      | 259        | 0.444     |
| 93        | 258         | 0.249     | 258        | 0.453     | 258        | 0.372     | 258        | 0.425     |
| 94        | 257         | 0.225     | 257        | 0.501     | 257        | 0.377     | 257        | 0.465     |
| 95        | 256         | 0.204     | 256        | 0.527     | 256        | 0.389     | 256        | 0.487     |
| 96        | 255         | 0.185     | 255        | 0.558     | 255        | 0.408     | 255        | 0.513     |
| 97        | 254         | 0.173     | 254        | 0.593     | 254        | 0.426     | 254        | 0.542     |
| 98        | 253         | 0.162     | 253        | 0.63      | 253        | 0.447     | 253        | 0.574     |
| 99        | 252         | 0.158     | 252        | 0.666     | 252        | 0.47      | 252        | 0.606     |
| 100       | 251         | 0.156     | 251        | 0.703     | 251        | 0.493     | 251        | 0.636     |
| 101       | 250         | 0.161     | 250        | 0.739     | 250        | 0.519     | 250        | 0.668     |
| 102       | 249         | 0.176     | 249        | 0.779     | 249        | 0.548     | 249        | 0.706     |
| 103       | 248         | 0.202     | 248        | 0.825     | 248        | 0.584     | 248        | 0.748     |
| 104       | 247         | 0.243     | 247        | 0.88      | 247        | 0.629     | 247        | 0.801     |
| 105       | 246         | 0.304     | 246        | 0.947     | 246        | 0.688     | 246        | 0.867     |
| 106       | 245         | 0.391     | 245        | 1.033     | 245        | 0.76      | 245        | 0.95      |
| 107       | 244         | 0.512     | 244        | 1.139     | 244        | 0.851     | 244        | 1.054     |
| 108       | 243         | 0.674     | 243        | 1.265     | 243        | 0.958     | 243        | 1.178     |
| 109       | 242         | 0.885     | 242        | 1.413     | 242        | 1.081     | 242        | 1.327     |
| 110       | 241         | 1.143     | 241        | 1.569     | 241        | 1.201     | 241        | 1.488     |
| 111       | 240         | 1.431     | 240        | 1.708     | 240        | 1.301     | 240        | 1.63      |
| 112       | 239         | 1.673     | 239        | 1.796     | 239        | 1.364     | 239        | 1.726     |
| 113       | 238         | 1.832     | 238        | 1.854     | 238        | 1.381     | 238        | 1.786     |
| 114       | 237         | 1.887     | 237        | 1.863     | 237        | 1.4       | 237        | 1.8       |
| 115       | 236         | 1.893     | 236        | 1.863     | 236        | 1.397     | 236        | 1.801     |
| 116       | 235         | 1.871     | 235        | 1.86      | 235        | 1.389     | 235        | 1.795     |
| 117       | 234         | 1.875     | 234        | 1.851     | 234        | 1.387     | 234        | 1.788     |
| 118       | 233         | 1.882     | 233        | 1.844     | 233        | 1.377     | 233        | 1.78      |
| 119       | 232         | 1.847     | 232        | 1.844     | 232        | 1.372     | 232        | 1.772     |
| 120       | 231         | 1.816     | 231        | 1.822     | 231        | 1.358     | 231        | 1.762     |
| 121       | 230         | 1.820     | 230        | 1.813     | 230        | 1.352     | 230        | 1.752     |
| 122       | 229         | 1.814     | 229        | 1.801     | 229        | 1.34      | 229        | 1.74      |
| 123       | 228         | 1.811     | 228        | 1.793     | 228        | 1.323     | 228        | 1.729     |
| 124       | 227         | 1.795     | 227        | 1.782     | 227        | 1.315     | 227        | 1.721     |
| 125       | 226         | 1.783     | 226        | 1.778     | 226        | 1.308     | 226        | 1.711     |
| 126       | 225         | 1.772     | 225        | 1.775     | 225        | 1.303     | 225        | 1.702     |
| 127       | 224         | 1.756     | 224        | 1.751     | 224        | 1.298     | 224        | 1.691     |
| 128       | 223         | 1.753     | 223        | 1.745     | 223        | 1.276     | 223        | 1.68      |
| 129       | 222         | 1.742     | 222        | 1.732     | 222        | 1.27      | 222        | 1.672     |
| 130       | 221         | 1.741     | 221        | 1.723     | 221        | 1.256     | 221        | 1.662     |
| 131       | 220         | 1.724     | 220        | 1.711     | 220        | 1.248     | 220        | 1.652     |
| 132       | 219         | 1.719     | 219        | 1.699     | 219        | 1.241     | 219        | 1.636     |
| 133       | 218         | 1.696     | 218        | 1.698     | 218        | 1.224     | 218        | 1.627     |
| 134       | 217         | 1.686     | 217        | 1.678     | 217        | 1.212     | 217        | 1.618     |
| 135       | 216         | 1.652     | 216        | 1.663     | 216        | 1.2       | 216        | 1.6       |
| 136       | 215         | 1.654     | 215        | 1.649     | 215        | 1.188     | 215        | 1.581     |
| 137       | 214         | 1.65      | 214        | 1.626     | 214        | 1.168     | 214        | 1.568     |
| 138       | 213         | 1.616     | 213        | 1.607     | 213        | 1.147     | 213        | 1.546     |
| 139       | 212         | 1.61      | 212        | 1.583     | 212        | 1.12      | 212        | 1.522     |
| 140       | 211         | 1.583     | 211        | 1.553     | 211        | 1.103     | 211        | 1.503     |
| 141       | 210         | 1.548     | 210        | 1.538     | 210        | 1.073     | 210        | 1.475     |
| 142       | 209         | 1.521     | 209        | 1.509     | 209        | 1.049     | 209        | 1.448     |
| 143       | 208         | 1.49      | 208        | 1.476     | 208        | 1.016     | 208        | 1.417     |
| 144       | 207         | 1.473     | 207        | 1.445     |            |           |            |           |
